# Supplementary material for: CRISPR/sgRNA-directed synergistic activation mediator (SAM) as a therapeutic tool for Parkinson´s disease
Source: PubMed Central journal article supplement (PMC10788271; doi:10.1038/s41434-023-00414-0), 2023-08-04
Supplement: 41434_2023_414_MOESM1_ESM.pdf [file 41434_2023_414_MOESM1_ESM.pdf]

| GEN | ID    | Sense | Species | FW                        | RW                        |
|-----|-------|-------|---------|---------------------------|---------------------------|
| TH  | 25085 | Neg   | Rat     | CACCGGGTCACTTACTGTTAGACCT | AAACAGGTCTAACAGTAAGTGACCC |
| TH  | 25085 | Neg   | Rat     | CACCGGAAGGCCTTAGGGAGCTGCC | AAACGGCAGCTCCCTAAGGCCTTC  |
| TH  | 25085 | Pos   | Rat     | CACCGGAGACACAGAATGTTCCAGA | AAACTCTGGAACATTCTGTGTCTCC |
| TH  | 25085 | Neg   | Rat     | CACCGGTGCCAGCACATATACCGAC | AAACGTCGGTATATGTGCTGGCACC |
| TH  | 25085 | Neg   | Rat     | CACCGGAACATGGCCCATGTCCTGG | AAACCCAGGACATGGGCCATGTTCC |
| TH  | 25085 | Pos   | Rat     | CACCGAGAGCTCTCTAACCAAACCA | AAACTGGTTTGGTTAGAGAGCTCTC |
| TH  | 25085 | Neg   | Rat     | CACCGTACGTCGTGCCTCGGGCTGA | AAACTCAGCCCGAGGCACGACGTAC |
| TH  | 25085 | Neg   | Rat     | CACCGAATTAGATCTAATGGGACGG | AAACCCGTCCCATTAGATCTAATTC |
| TH  | 25085 | Pos   | Rat     | CACCGGCTGTGCCTGAGGGAGGCGG | AAACCCGCCTCCCTCAGGCACAGCC |
| TH  | 25085 | Neg   | Rat     | CACCGGCCCCCTCGCCACAGCCCAA | AAACTTGGGCTGTGGCGAGGGGGCC |
| TH  | 25085 | Neg   | Rat     | CACCGGCAGGATGCCAAGCAGGCCG | AAACCGGCCTGCTTGGCATCCTGCC |
| TH  | 25085 | Neg   | Rat     | CACCGAGCCCTTAGGAAATCCAGCA | AAACTGCTGGATTCCTAAGGGCTC  |
| TH  | 25085 | Neg   | Rat     | CACCGCCTGCCCTACGTCGTGCCTC | AAACGAGGCACGACGTAGGGCAGGC |

Supplementary Table 1. Sequences tested as *Th sgRNA*.

Supplementary Figure 1.

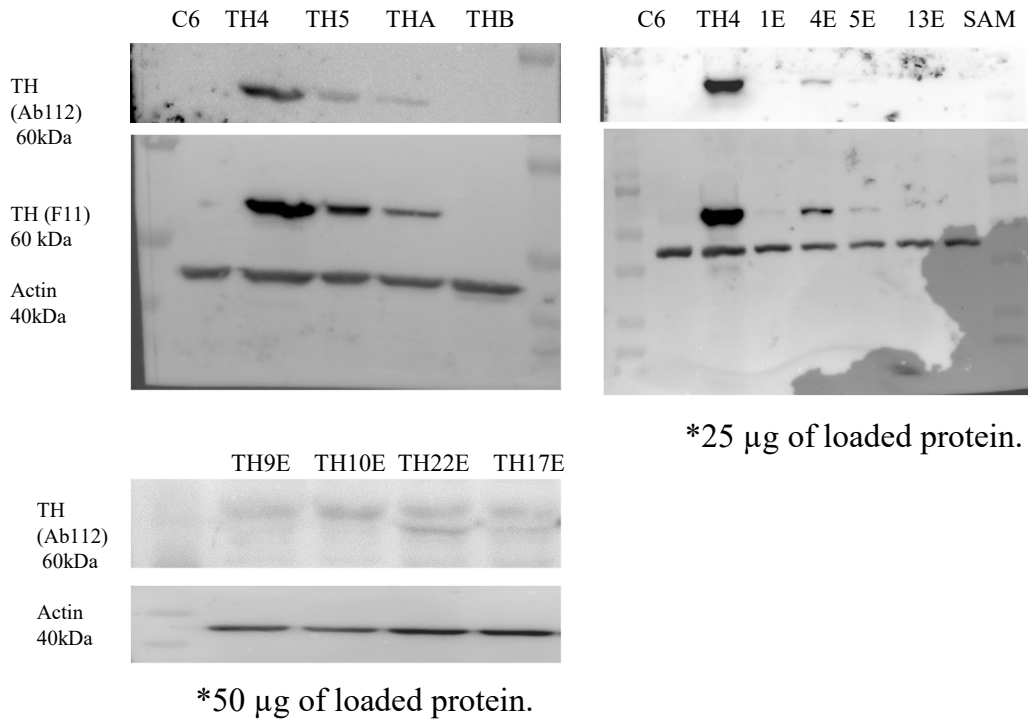

A) Western Blot of the tested *Th* sgRNA in the transfected C6 cell line.

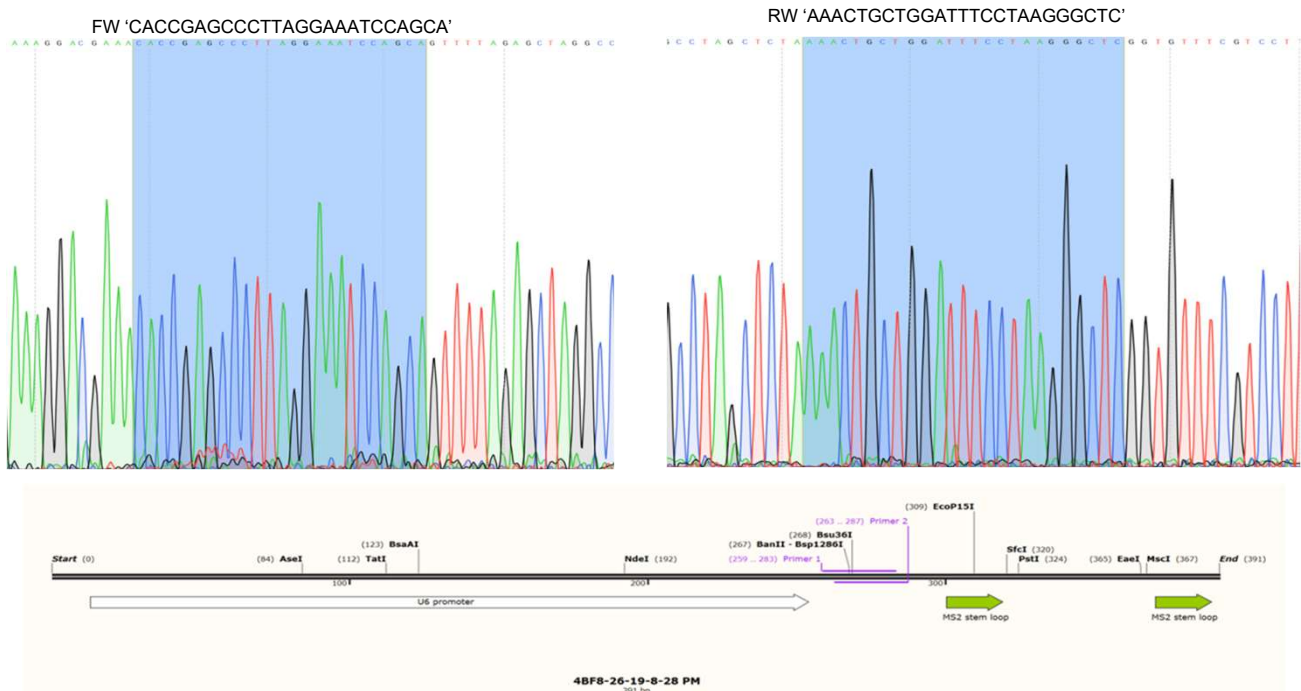

B) Sequencing *Th4* sgRNA

**IH TH**

Left      Right

**IH GFAP**

Left      Right

Sham

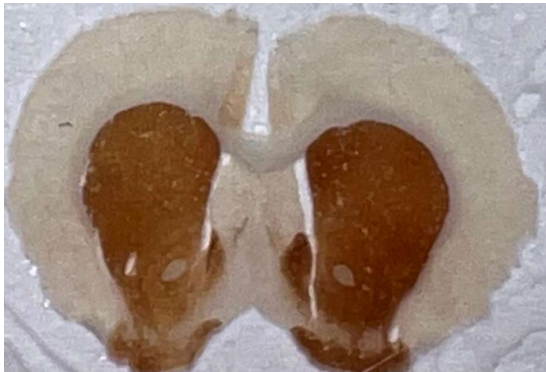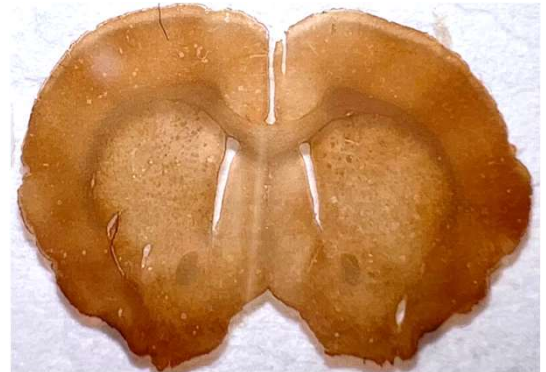

6-OHDA  
+ AST

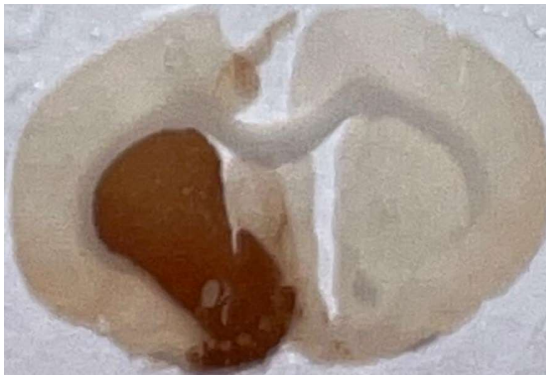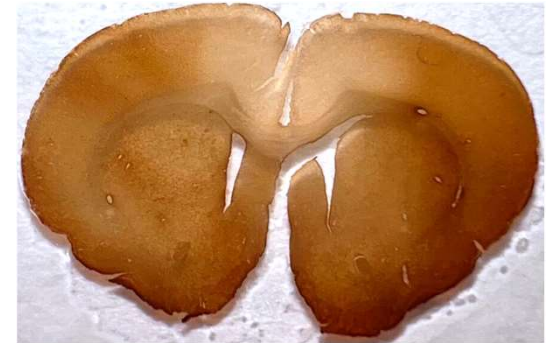

6-OHDA  
+ AST TH

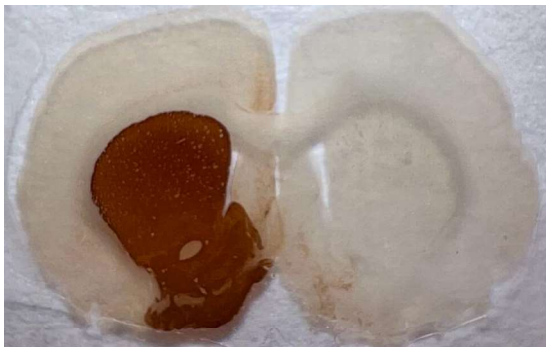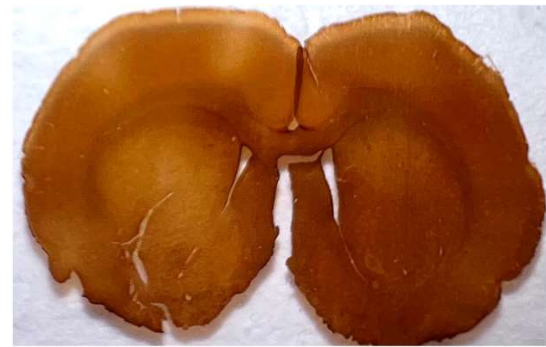

Supplementary Figure 2. TH and GFAP Immunocytochemistry brain slices of the experimental groups.

*IH TH Right striatum  
(lesioned)*

4X

10X

Sham

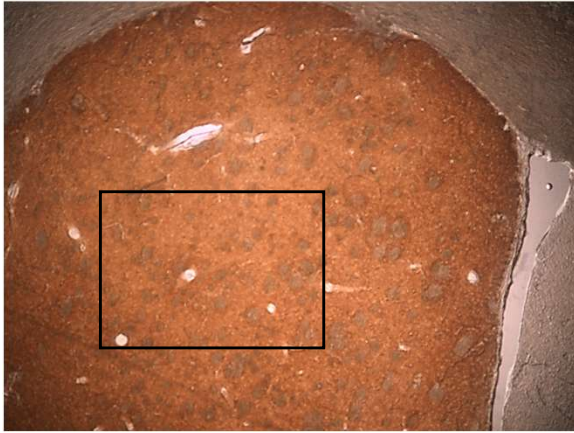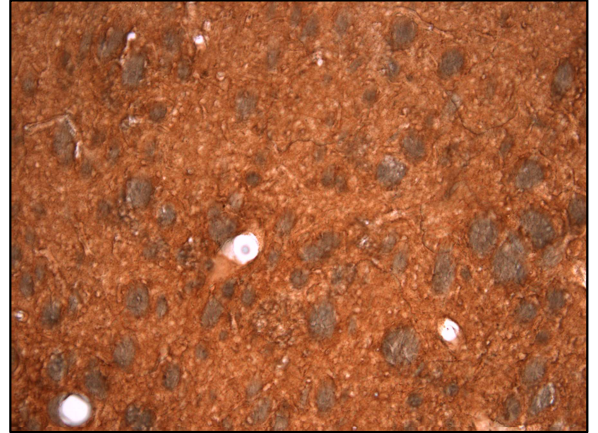

6-OHDA  
+ AST

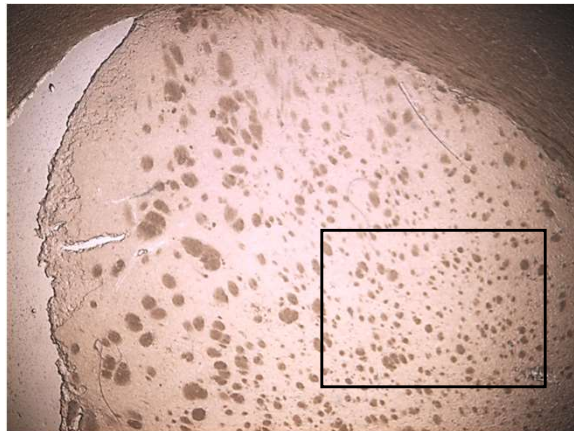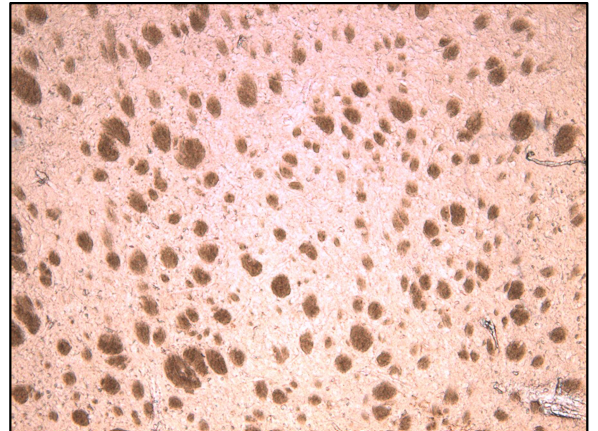

6-OHDA  
+ AST TH

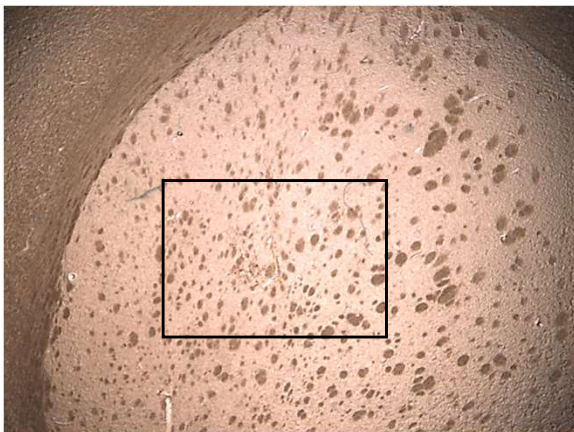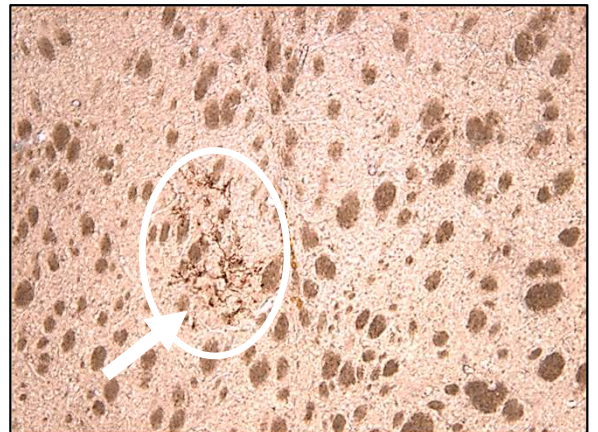

Supplementary Figure 3A. TH Immunohistochemistry of 6-OHDA lesioned (right) *striatum* side between the experimental groups.

*IH TH Left striatum (intact)*

4X

10X

Sham

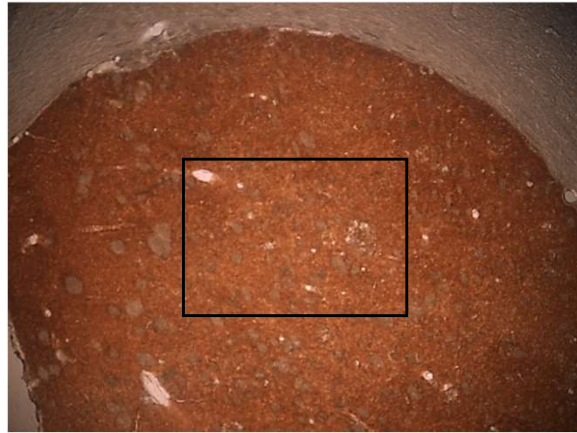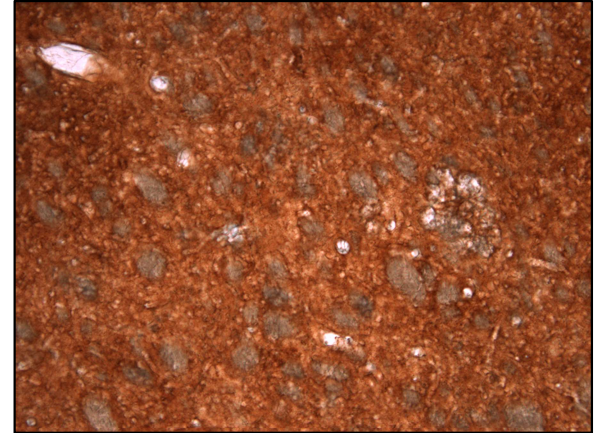

6-OHDA  
+ AST

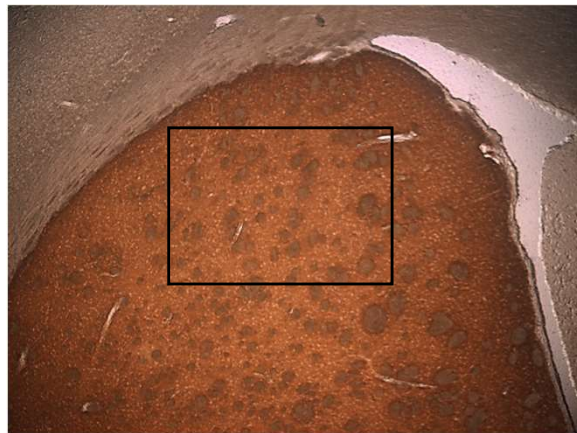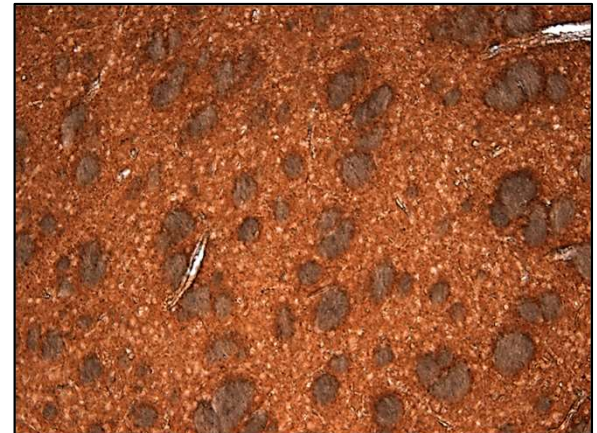

6-OHDA  
+ AST TH

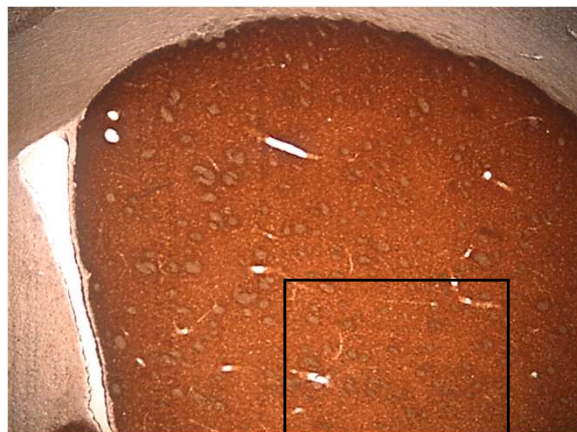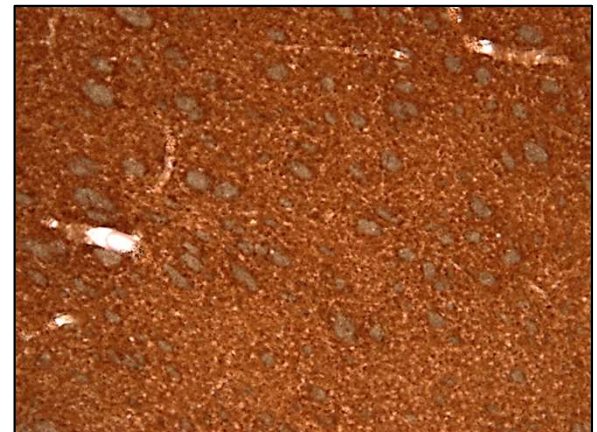

Supplementary Figure 3B. TH Immunohistochemistry of intact (left) *striatum* side between the experimental groups.

*IH GFAP Right striatum  
(lesioned)*

4X

10X

20X

Sham

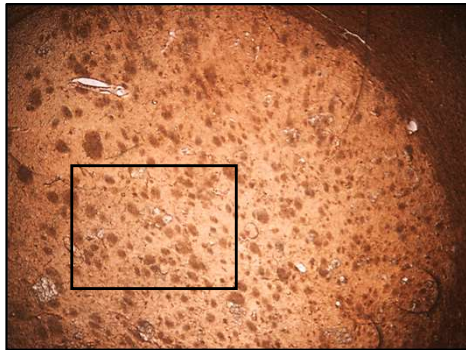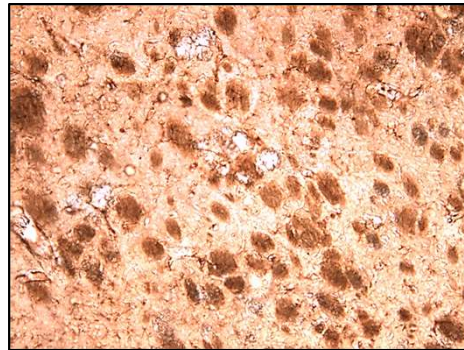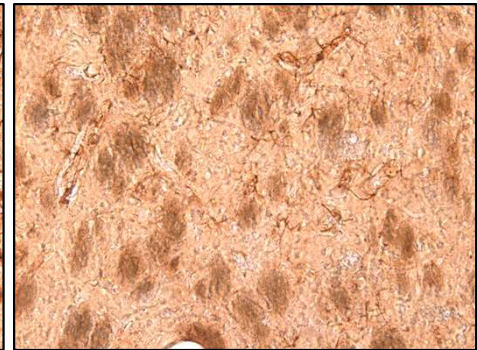

6-OHDA  
+ AST

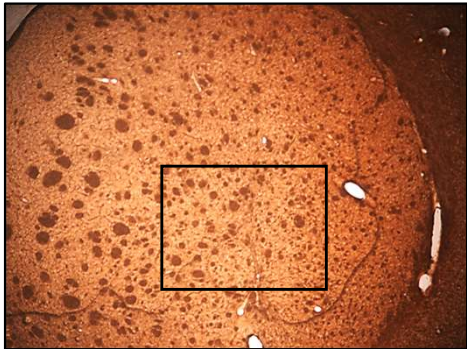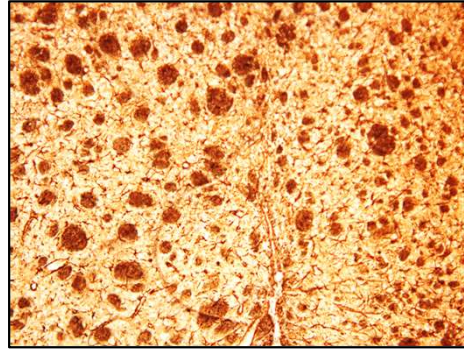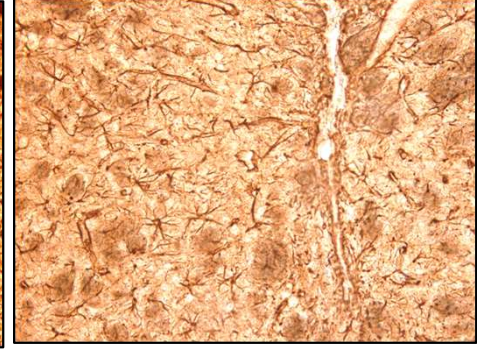

6-OHDA  
+ AST  
TH

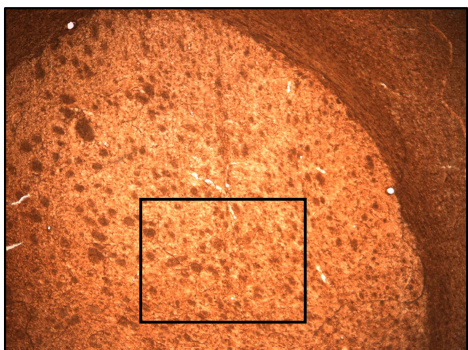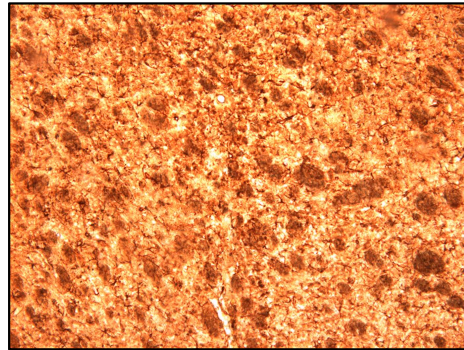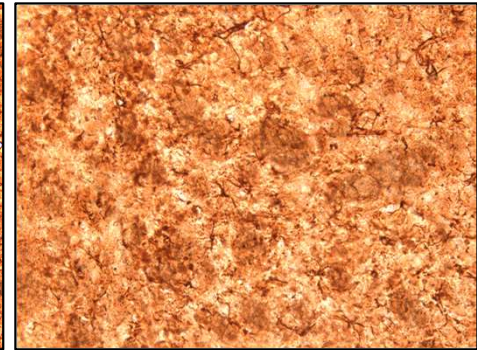

Supplementary Figure 4A. GFAP Immunohistochemistry of 6-OHDA lesioned (right) *striatum* side between the experimental groups.

*IH GFAP Left striatum (intact)*

4X

10X

20X

Sham

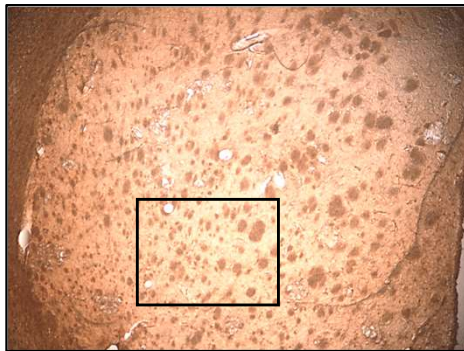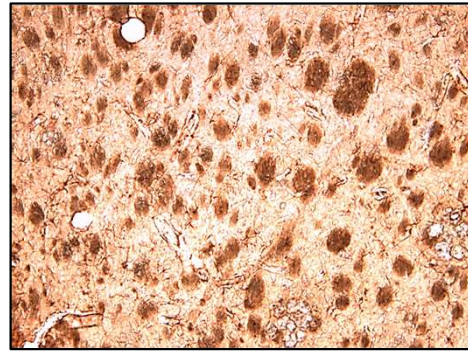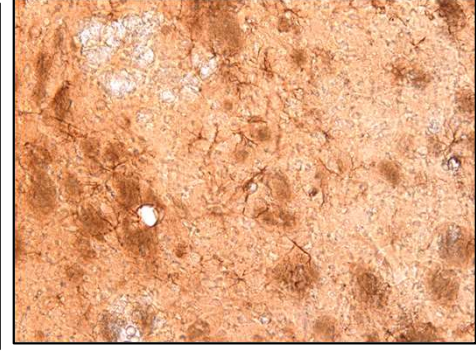

6-OHDA  
+ AST

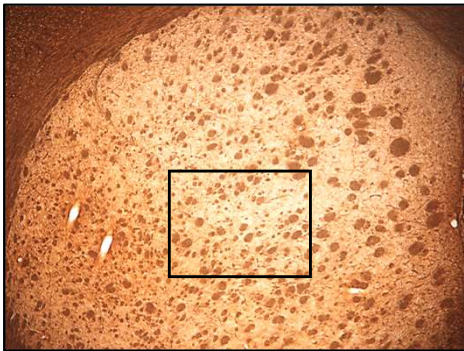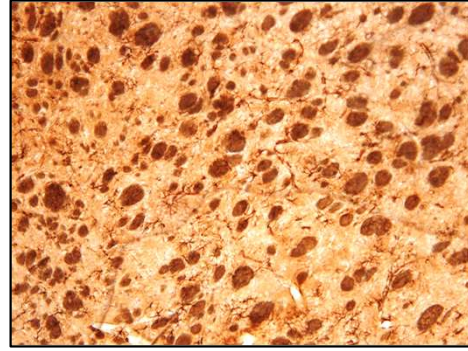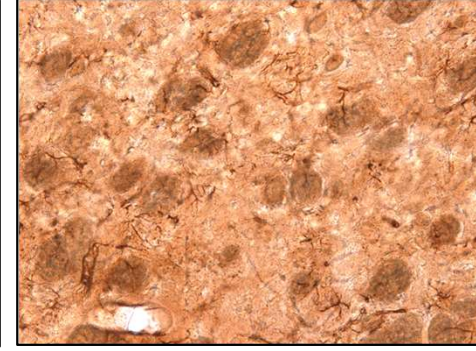

6-OHDA  
+ AST TH

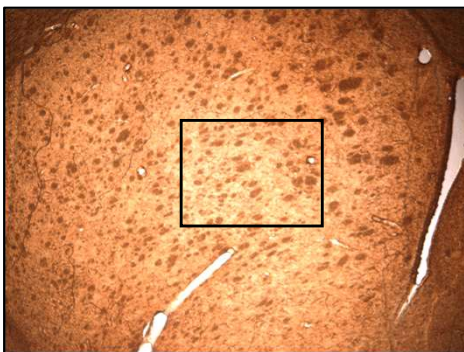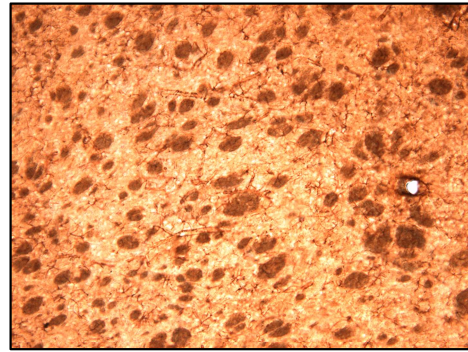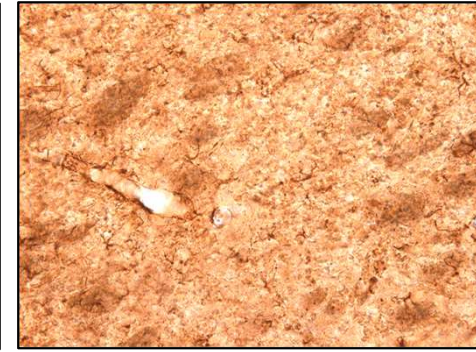

Supplementary Figure 4B. GFAP Immunohistochemistry of intact (left) *striatum* side between the experimental groups.

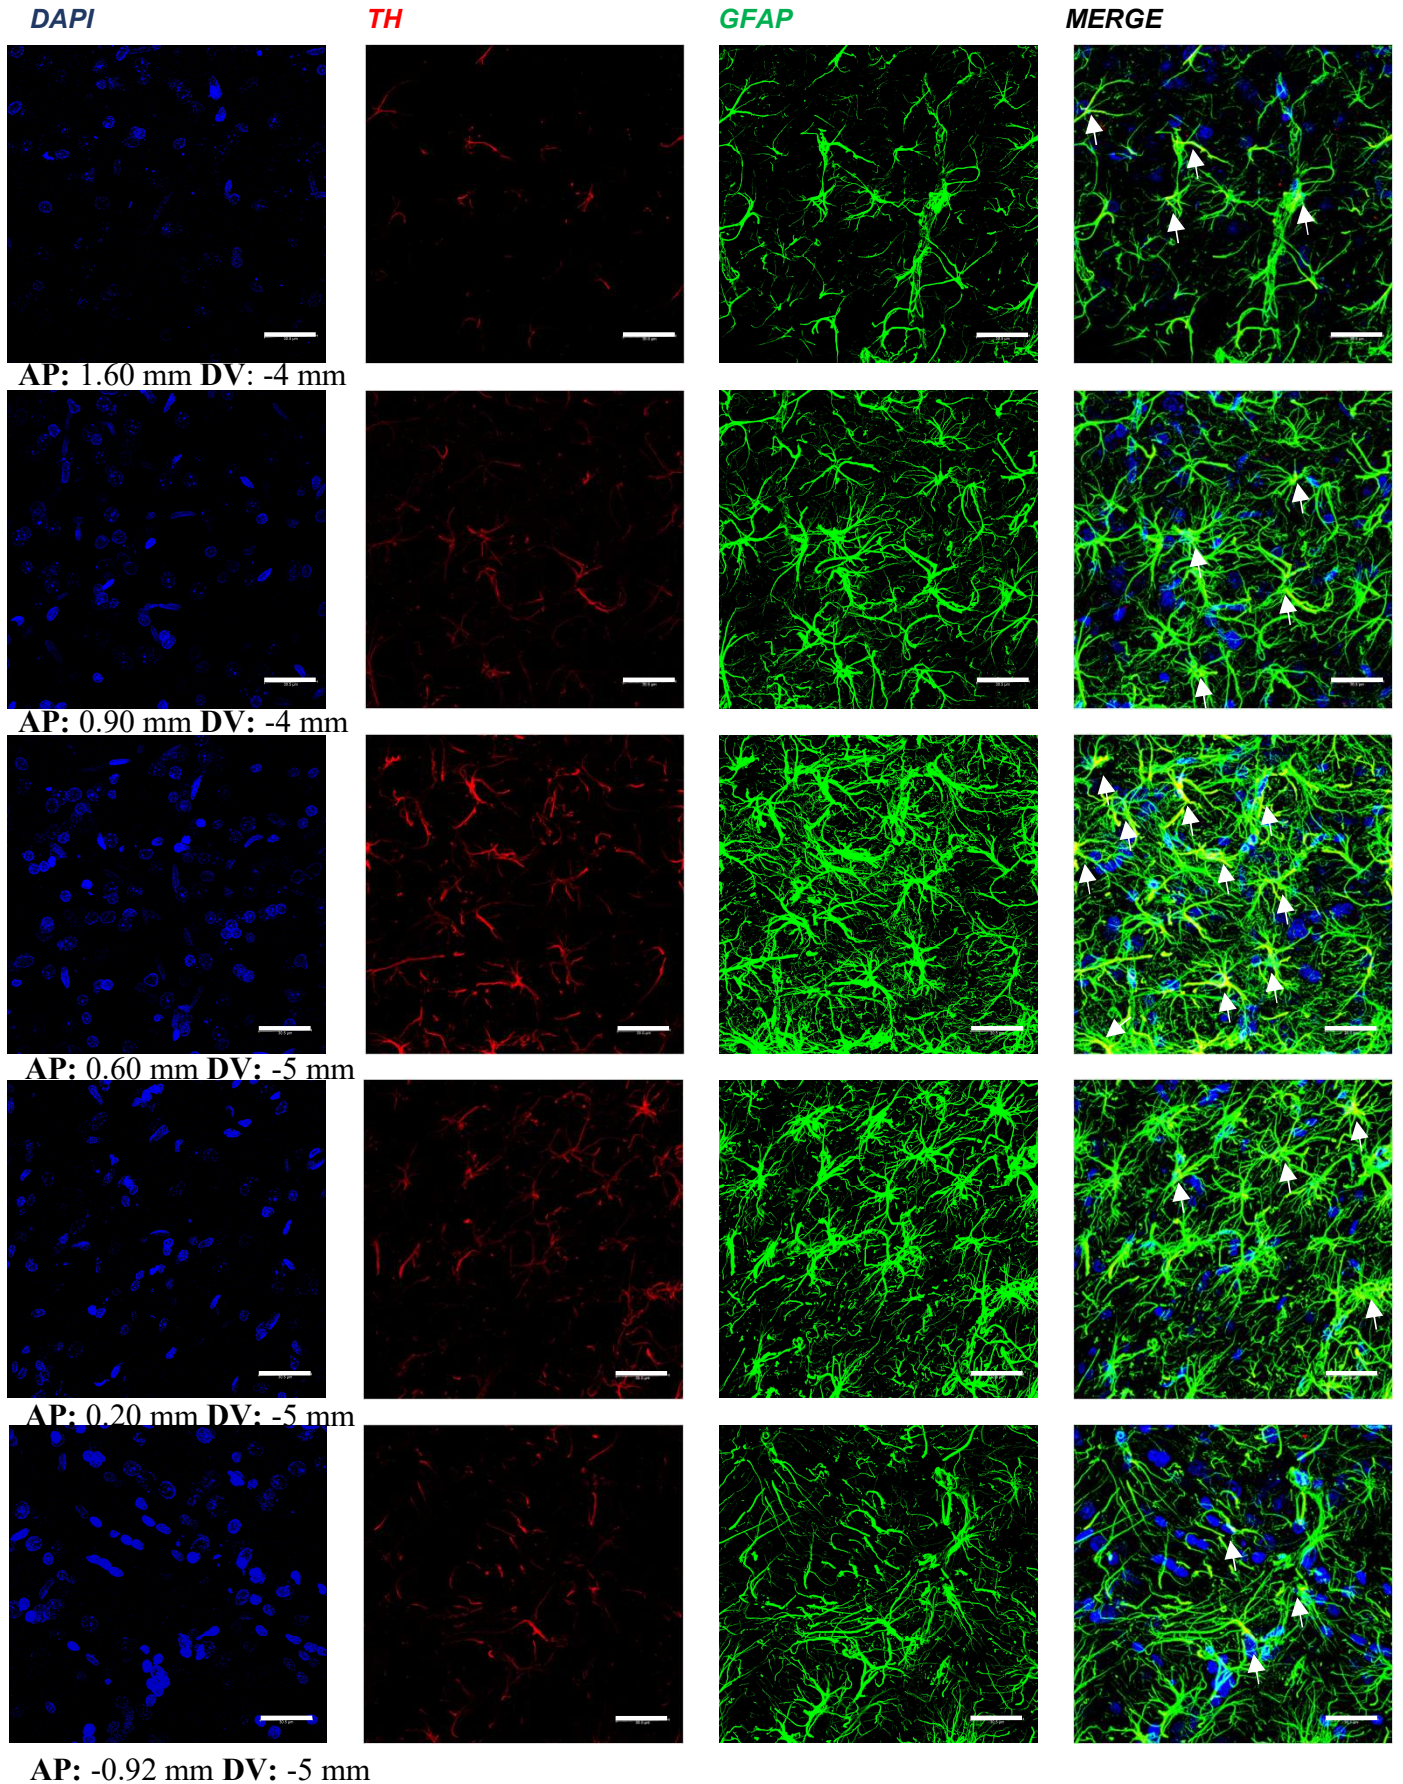

Supplementary Figure 5. Complementary figure of confocal images presents at Figure 6. DAPI (nuclei) in blue fluorescent signal, Th is revealed with red, and GFAP with a green fluorescent signal. Cells expressing both Th and GFAP show a yellow signal. Bars represent 30  $\mu$ m.



Intact (left)

Lesioned (right)

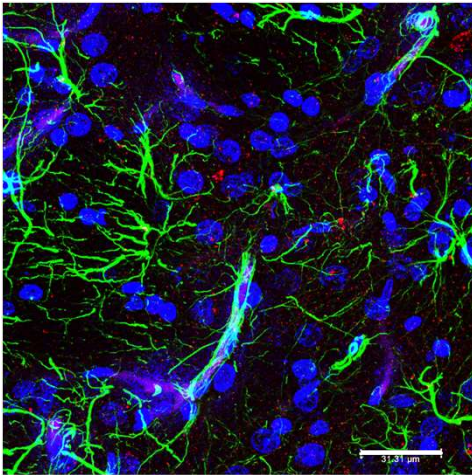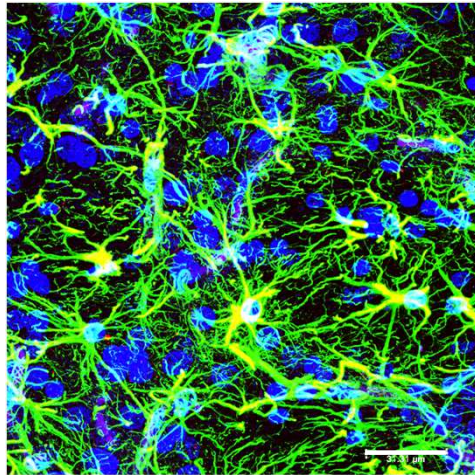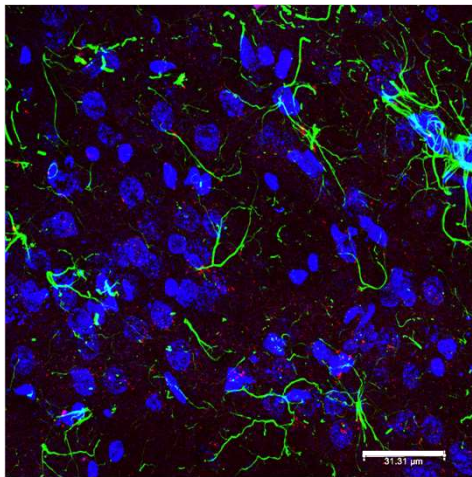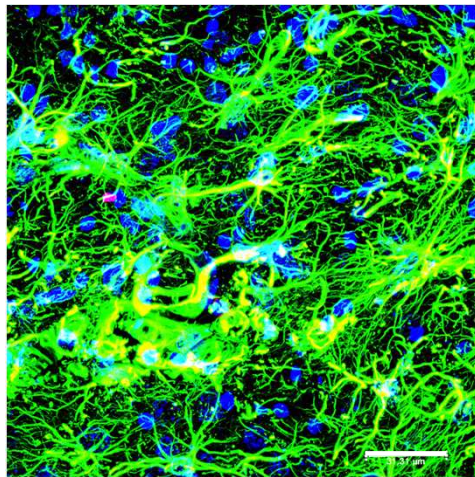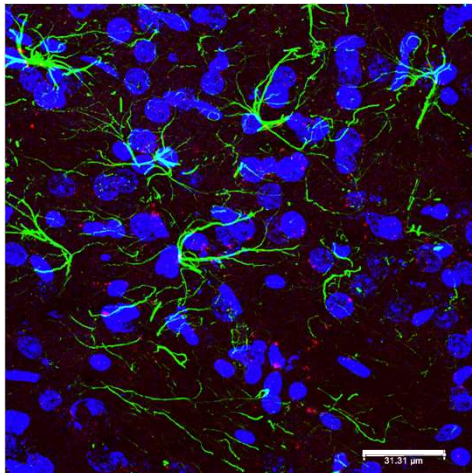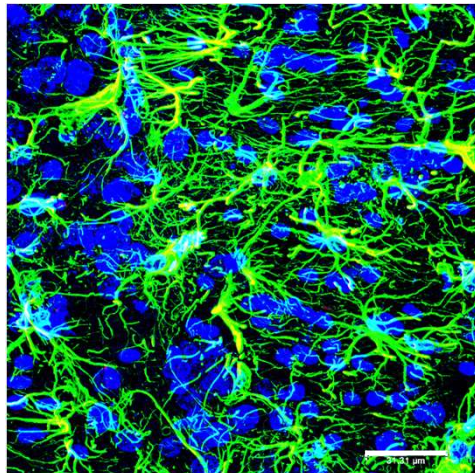

Supplementary Figure 6. GFAP expression between intact and 6-OHDA lesioned *striatum* side of 6-OHDA + AST TH group. DAPI (nuclei) in blue fluorescent signal, Th is revealed with red, and GFAP with a green fluorescent signal. Bars represent 30 μm.
